# Supplementary material
Source: MDPI journal article supplement (https://www.mdpi.com/2304-6740/10/8/118)

# checkCIF/PLATON report

Structure factors have been supplied for datablock(s) c20yb71\_0m\_aa\_ca

THIS REPORT IS FOR GUIDANCE ONLY. IF USED AS PART OF A REVIEW PROCEDURE FOR PUBLICATION, IT SHOULD NOT REPLACE THE EXPERTISE OF AN EXPERIENCED CRYSTALLOGRAPHIC REFEREE.

No syntax errors found.      CIF dictionary      Interpreting this report

## Datablock: c20yb71\_0m\_aa\_ca

---

Bond precision:    C-C = 0.0037 A

Wavelength=0.71073

Cell:                a=11.6745(12)        b=13.2064(13)        c=15.5353(16)  
                      alpha=67.641(3)      beta=85.612(4)      gamma=73.680(4)  
Temperature:        100 K

|                | Calculated                           | Reported                          |
|----------------|--------------------------------------|-----------------------------------|
| Volume         | 2124.6(4)                            | 2124.6(4)                         |
| Space group    | P -1                                 | P -1                              |
| Hall group     | -P 1                                 | -P 1                              |
| Moiety formula | C88 H78 Ca N8 O18 Zn2,<br>2(C2 H6 O) | C88 H78 Ca N8 O18 Zn2, C2<br>H6 O |
| Sum formula    | C92 H90 Ca N8 O20 Zn2                | C92 H90 Ca N8 O20 Zn2             |
| Mr             | 1798.58                              | 1798.53                           |
| Dx,g cm-3      | 1.406                                | 1.406                             |
| Z              | 1                                    | 1                                 |
| Mu (mm-1)      | 0.703                                | 0.703                             |
| F000           | 938.0                                | 938.0                             |
| F000'          | 939.20                               |                                   |
| h,k,lmax       | 16,18,22                             | 16,18,22                          |
| Nref           | 13093                                | 13031                             |
| Tmin,Tmax      | 0.908,0.967                          | 0.657,0.746                       |
| Tmin'          | 0.843                                |                                   |

Correction method= # Reported T Limits: Tmin=0.657 Tmax=0.746  
AbsCorr = MULTI-SCAN

Data completeness= 0.995

Theta(max)= 30.593

R(reflections)= 0.0429( 8339)

wR2(reflections)= 0.1406( 13031)

S = 1.046

Npar= 563

---

The following ALERTS were generated. Each ALERT has the format

**test-name\_ALERT\_alert-type\_alert-level.**

Click on the hyperlinks for more details of the test.

### ● Alert level C

|                   |                                                  |        |        |
|-------------------|--------------------------------------------------|--------|--------|
| PLAT094_ALERT_2_C | Ratio of Maximum / Minimum Residual Density .... | 3.60   | Report |
| PLAT905_ALERT_3_C | Negative K value in the Analysis of Variance ... | -1.960 | Report |
| PLAT910_ALERT_3_C | Missing # of FCF Reflection(s) Below Theta(Min). | 5      | Note   |
| PLAT911_ALERT_3_C | Missing FCF Refl Between Thmin & STh/L= 0.600    | 6      | Report |
| PLAT918_ALERT_3_C | Reflection(s) with I(obs) much Smaller I(calc) . | 1      | Check  |
| PLAT939_ALERT_3_C | Large Value of Not (SHELXL) Weight Optimized S . | 45.26  | Check  |

### ● Alert level G

FORMU01\_ALERT\_1\_G There is a discrepancy between the atom counts in the  
     \_chemical\_formula\_sum and \_chemical\_formula\_moiety. This is  
     usually due to the moiety formula being in the wrong format.  
     Atom count from \_chemical\_formula\_sum: C92 H90 Ca1 N8 O20 Zn2  
     Atom count from \_chemical\_formula\_moiety:C90 H84 Ca1 N8 O19 Zn2

|                   |                                                  |      |              |
|-------------------|--------------------------------------------------|------|--------------|
| PLAT007_ALERT_5_G | Number of Unrefined Donor-H Atoms .....          | 5    | Report       |
| PLAT042_ALERT_1_G | Calc. and Reported MoietyFormula Strings Differ  |      | Please Check |
| PLAT171_ALERT_4_G | The CIF-Embedded .res File Contains EADP Records | 2    | Report       |
| PLAT232_ALERT_2_G | Hirshfeld Test Diff (M-X) Zn1 --O1 .             | 5.2  | s.u.         |
| PLAT300_ALERT_4_G | Atom Site Occupancy of O1W Constrained at        | 0.5  | Check        |
| PLAT300_ALERT_4_G | Atom Site Occupancy of ClW Constrained at        | 0.5  | Check        |
| PLAT300_ALERT_4_G | Atom Site Occupancy of C2W Constrained at        | 0.5  | Check        |
| PLAT300_ALERT_4_G | Atom Site Occupancy of H1WO Constrained at       | 0.5  | Check        |
| PLAT300_ALERT_4_G | Atom Site Occupancy of H1WA Constrained at       | 0.5  | Check        |
| PLAT300_ALERT_4_G | Atom Site Occupancy of H1WB Constrained at       | 0.5  | Check        |
| PLAT300_ALERT_4_G | Atom Site Occupancy of H2WA Constrained at       | 0.5  | Check        |
| PLAT300_ALERT_4_G | Atom Site Occupancy of H2WB Constrained at       | 0.5  | Check        |
| PLAT300_ALERT_4_G | Atom Site Occupancy of H2WC Constrained at       | 0.5  | Check        |
| PLAT300_ALERT_4_G | Atom Site Occupancy of O2W Constrained at        | 0.5  | Check        |
| PLAT300_ALERT_4_G | Atom Site Occupancy of C3W Constrained at        | 0.5  | Check        |
| PLAT300_ALERT_4_G | Atom Site Occupancy of C4W Constrained at        | 0.5  | Check        |
| PLAT300_ALERT_4_G | Atom Site Occupancy of H2WO Constrained at       | 0.5  | Check        |
| PLAT300_ALERT_4_G | Atom Site Occupancy of H3WA Constrained at       | 0.5  | Check        |
| PLAT300_ALERT_4_G | Atom Site Occupancy of H3WB Constrained at       | 0.5  | Check        |
| PLAT300_ALERT_4_G | Atom Site Occupancy of H4WA Constrained at       | 0.5  | Check        |
| PLAT300_ALERT_4_G | Atom Site Occupancy of H4WB Constrained at       | 0.5  | Check        |
| PLAT300_ALERT_4_G | Atom Site Occupancy of H4WC Constrained at       | 0.5  | Check        |
| PLAT302_ALERT_4_G | Anion/Solvent/Minor-Residue Disorder (Resd 2 )   | 100% | Note         |
| PLAT302_ALERT_4_G | Anion/Solvent/Minor-Residue Disorder (Resd 3 )   | 100% | Note         |
| PLAT304_ALERT_4_G | Non-Integer Number of Atoms in ..... (Resd 2 )   | 4.50 | Check        |
| PLAT304_ALERT_4_G | Non-Integer Number of Atoms in ..... (Resd 3 )   | 4.50 | Check        |
| PLAT411_ALERT_2_G | Short Inter H...H Contact H8 ..H3WA .            | 2.07 | Ang.         |
|                   | x,y,z = 1_555                                    |      | Check        |
| PLAT720_ALERT_4_G | Number of Unusual/Non-Standard Labels .....      | 12   | Note         |
| PLAT789_ALERT_4_G | Atoms with Negative _atom_site_disorder_group #  | 18   | Check        |
| PLAT883_ALERT_1_G | No Info/Value for _atom_sites_solution_primary . |      | Please Do !  |
| PLAT912_ALERT_4_G | Missing # of FCF Reflections Above STh/L= 0.600  | 50   | Note         |
| PLAT933_ALERT_2_G | Number of OMIT Records in Embedded .res File ... | 6    | Note         |
| PLAT941_ALERT_3_G | Average HKL Measurement Multiplicity .....       | 1.0  | Low          |
| PLAT978_ALERT_2_G | Number C-C Bonds with Positive Residual Density. | 2    | Info         |

- 0 **ALERT level A** = Most likely a serious problem - resolve or explain
- 0 **ALERT level B** = A potentially serious problem, consider carefully
- 6 **ALERT level C** = Check. Ensure it is not caused by an omission or oversight
- 35 **ALERT level G** = General information/check it is not something unexpected

3 ALERT type 1 CIF construction/syntax error, inconsistent or missing data  
5 ALERT type 2 Indicator that the structure model may be wrong or deficient  
6 ALERT type 3 Indicator that the structure quality may be low  
26 ALERT type 4 Improvement, methodology, query or suggestion  
1 ALERT type 5 Informative message, check

---

It is advisable to attempt to resolve as many as possible of the alerts in all categories. Often the minor alerts point to easily fixed oversights, errors and omissions in your CIF or refinement strategy, so attention to these fine details can be worthwhile. In order to resolve some of the more serious problems it may be necessary to carry out additional measurements or structure refinements. However, the purpose of your study may justify the reported deviations and the more serious of these should normally be commented upon in the discussion or experimental section of a paper or in the "special\_details" fields of the CIF. checkCIF was carefully designed to identify outliers and unusual parameters, but every test has its limitations and alerts that are not important in a particular case may appear. Conversely, the absence of alerts does not guarantee there are no aspects of the results needing attention. It is up to the individual to critically assess their own results and, if necessary, seek expert advice.

### **Publication of your CIF in IUCr journals**

A basic structural check has been run on your CIF. These basic checks will be run on all CIFs submitted for publication in IUCr journals (*Acta Crystallographica*, *Journal of Applied Crystallography*, *Journal of Synchrotron Radiation*); however, if you intend to submit to *Acta Crystallographica Section C* or *E* or *IUCrData*, you should make sure that full publication checks are run on the final version of your CIF prior to submission.

### **Publication of your CIF in other journals**

Please refer to the *Notes for Authors* of the relevant journal for any special instructions relating to CIF submission.

---

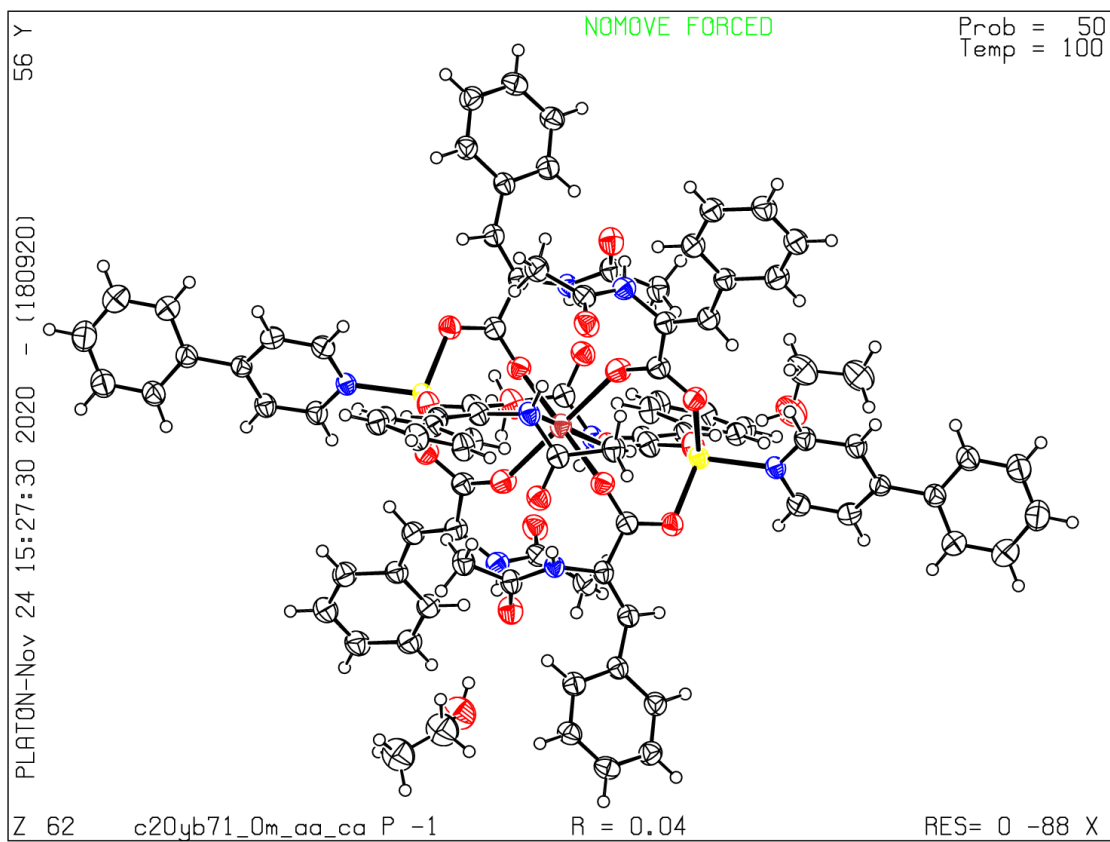

Supplement: s1 [file s1]
