# Supplementary material
Source: MDPI journal article supplement (https://www.mdpi.com/2304-6740/10/8/118)
Supplement: s1 [file s1]

# Supporting Information

## Synthesis of a heterometallic [Zn<sub>2</sub>Ca] pinwheel array stabilized by amide-amide synthons

Daniel Ejarque<sup>1</sup>, Teresa Calvet<sup>2</sup>, Mercè Font-Bardia<sup>3</sup>, Josefina Pons<sup>1,\*</sup>

<sup>1</sup>Departament de Química, Universitat Autònoma de Barcelona, 08193-Bellaterra, Barcelona, Spain

<sup>2</sup>Departament de Mineralogia, Petrologia i Geologia Aplicada, Universitat de Barcelona, Martí i Franquès s/n, 08028 Barcelona, Spain

<sup>3</sup>Unitat de Difracció de Raig-X, Centres Científics i Tecnològics de la Universitat de Barcelona (CCiTUB), Universitat de Barcelona, Solé i Sabarís, 1-3, 08028 Barcelona, Spain

\*Correspondence: josefina.pons@uab.es (J.P.); Tel.: +34-935-812-895

## PXRD patterns

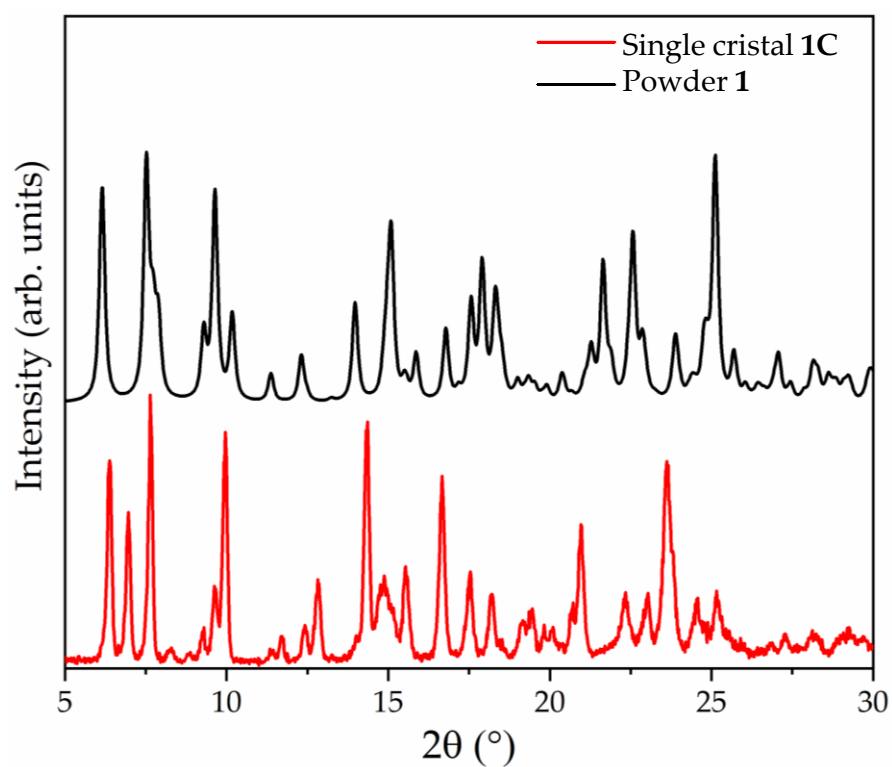

Figure S1. XRD patterns from the single crystal collected data at 100K of  $[\text{Zn}_2\text{Ca}(\mu\text{-ACA})_6(4\text{-phpy})_2]\cdot 2\text{EtOH}$  (**1C**) and powder XRD pattern at 298K of compound  $[\text{Zn}_2\text{Ca}(\mu\text{-ACA})_6(4\text{-phpy})_2]\cdot \text{EtOH}$  (**1**).

## HR-ESI-MS

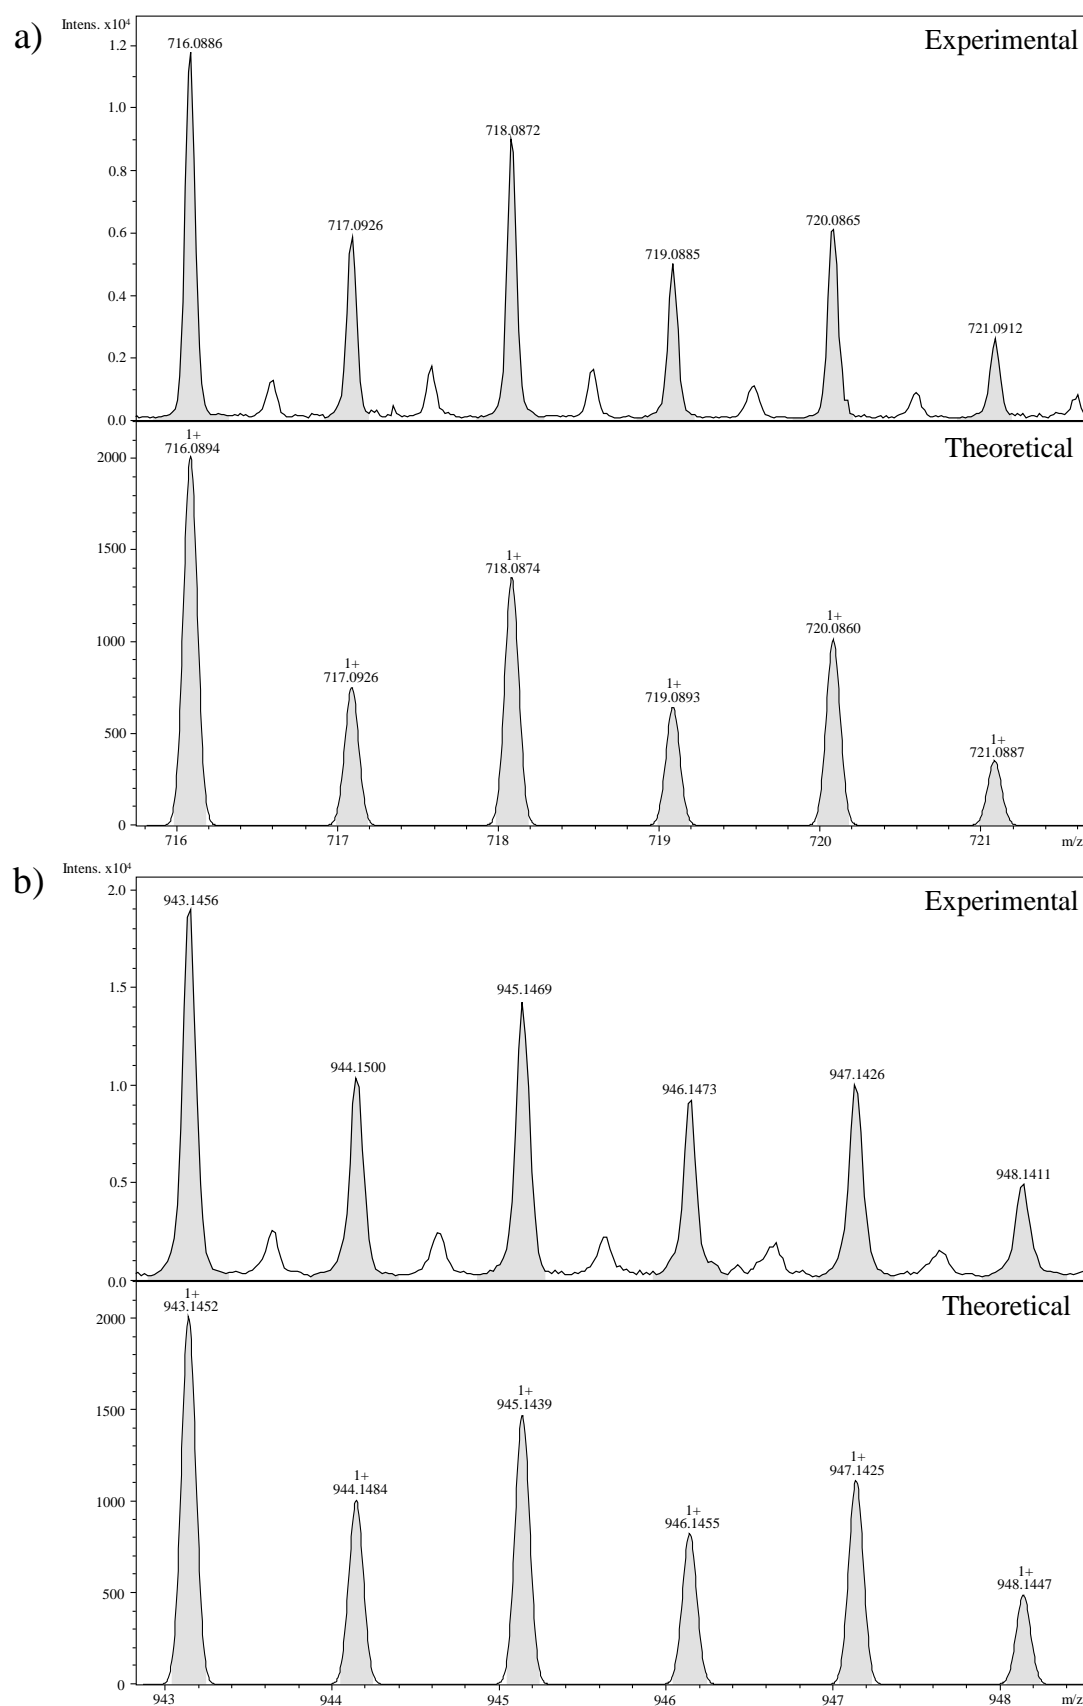

Figure S2. In detail views of the HR-ESI-MS fragments of  $[\text{Zn}_2\text{Ca}(\mu\text{-ACA})_6(4\text{-phpy})_2]\cdot\text{EtOH}$  (**1**): (a)  $[\text{ZnCa}(\text{ACA})_3]^+$ . (b)  $[\text{ZnCa}(\text{ACA})_4 + \text{Na}]^+$ .

# FTIR-ATR, $^1\text{H}$ , $^{13}\text{C}\{^1\text{H}\}$ and DEPT-135 spectroscopies

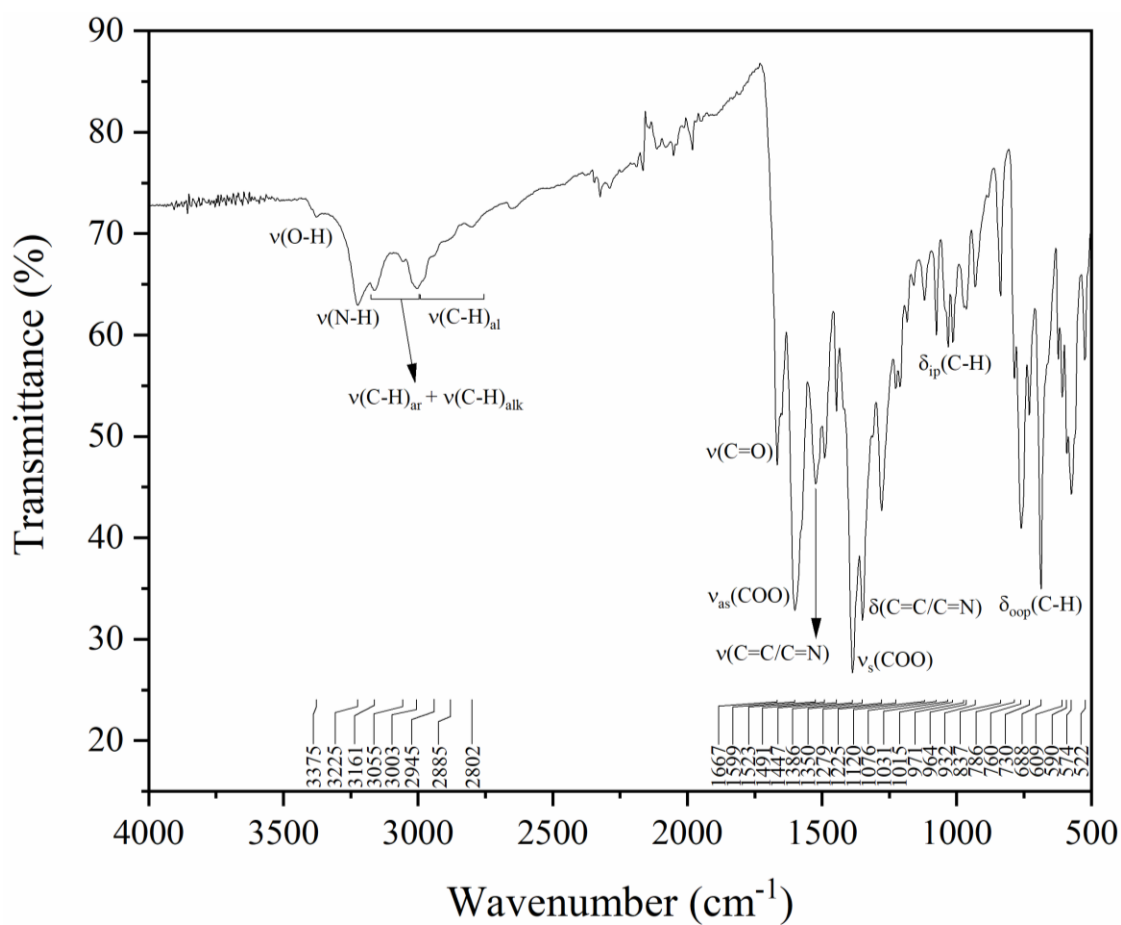

Figure S3. FTIR-ATR spectrum of compound  $[\text{Zn}_2\text{Ca}(\mu\text{-ACA})_6(4\text{-ppy})_2]\cdot\text{EtOH}$  (1).

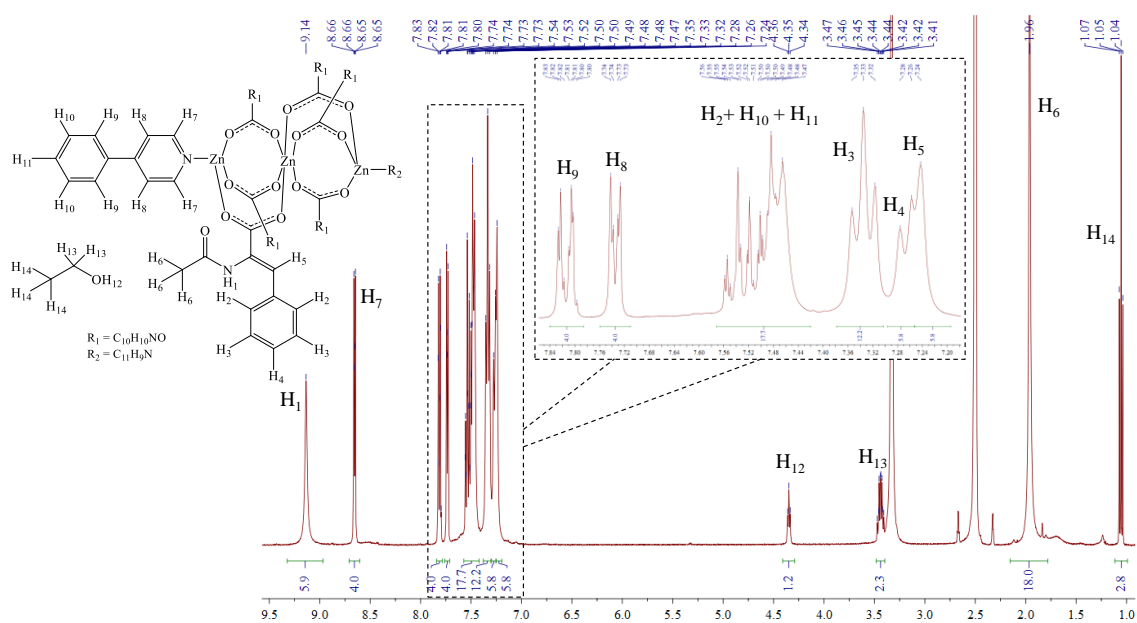

Figure S4.  $^1\text{H}$  NMR spectrum of compound  $[\text{Zn}_2\text{Ca}(\mu\text{-ACA})_6(4\text{-ppy})_2]\cdot\text{EtOH}$  (1).

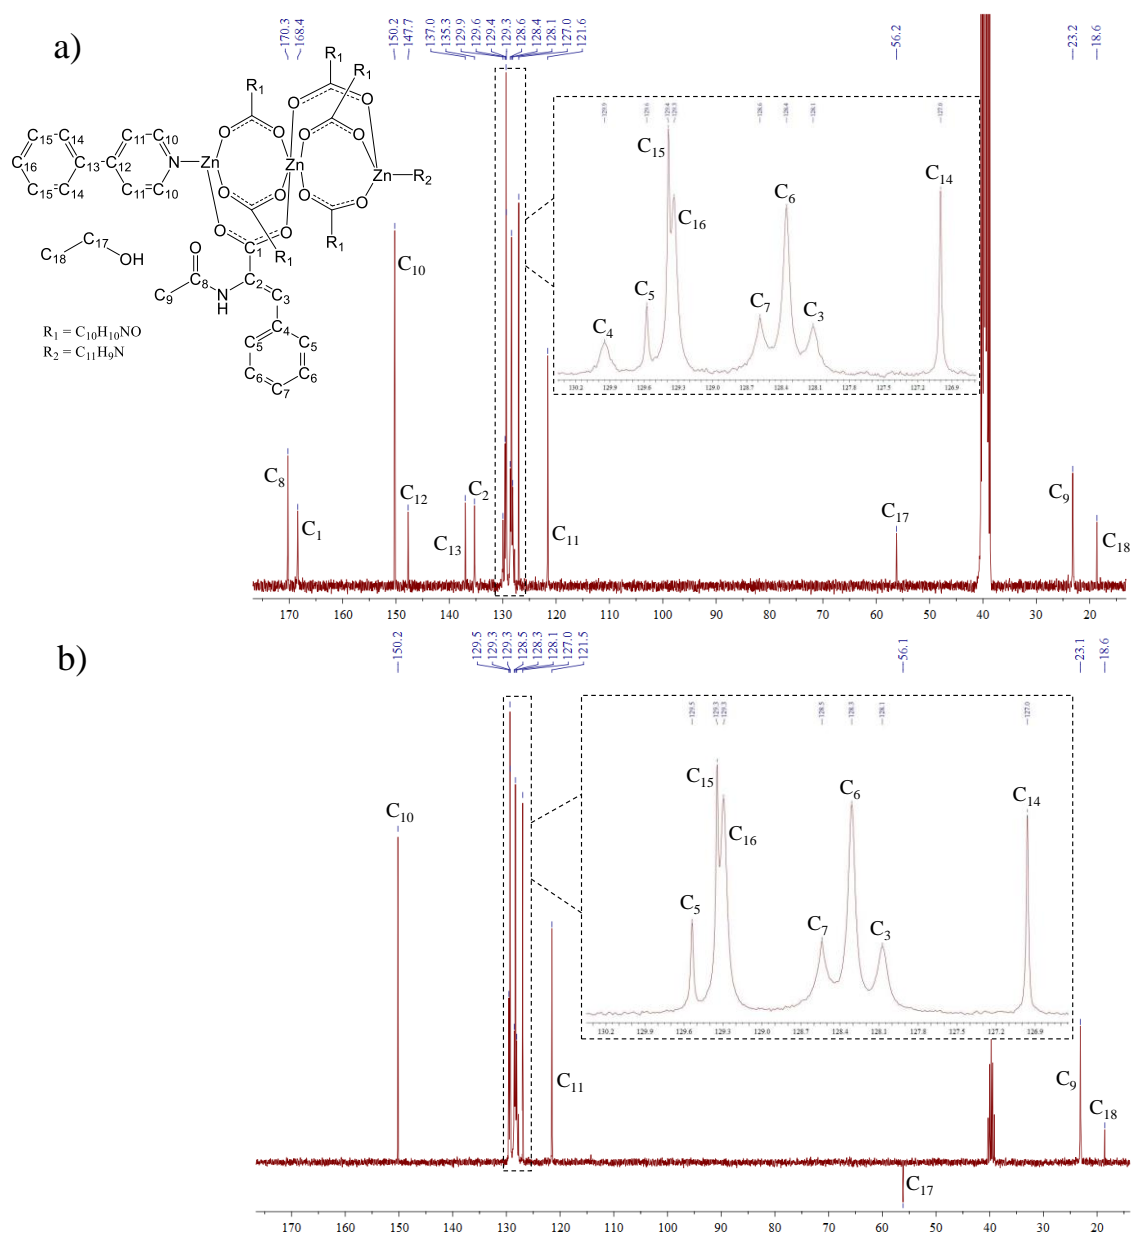

Figure S5. (a)  $^{13}\text{C}\{^1\text{H}\}$  NMR spectrum and (b) DEPT-135 NMR spectrum of compound  $[\text{Zn}_2\text{Ca}(\mu\text{-ACA})_6(4\text{-ppy})_2]\cdot\text{EtOH}$  (**1**).

## Geometric evaluation

Table S1. Geometry distortion analysis of the Zn(II) and Ca(II) *cores* from [Zn<sub>2</sub>Ca(μ-ACA)<sub>6</sub>(4-*phpy*)<sub>2</sub>·2EtOH (**1C**) using S parameters calculated with SHAPE [1,2].

| Label | Geometry <sup>a</sup> | S value      |
|-------|-----------------------|--------------|
| Zn1   | SP-4                  | 31.181       |
|       | <b>T-4</b>            | <b>0.959</b> |
|       | SS-4                  | 6.687        |
|       | vTBPY-4               | 1.351        |
| Ca    | HP-6                  | 31.277       |
|       | PPY-6                 | 29.426       |
|       | <b>OC-6</b>           | <b>0.100</b> |
|       | TPR-6                 | 16.073       |
|       | JPPY-5                | 32.823       |

Closer values have been highlighted in bold. <sup>a</sup>SP-4 = Square; T-4 = Tetrahedron; SS-4 = Seesaw; vTBPY-4 = Axially vacant trigonal bipyramid; HP-6 = Hexagon, PPY-6 = Pentagonal pyramid; OC-6 = Octahedron; TPR-6 = Trigonal prism; JPPY-5 = Johnson pentagonal pyramid.

## Hirshfeld Surface Analysis

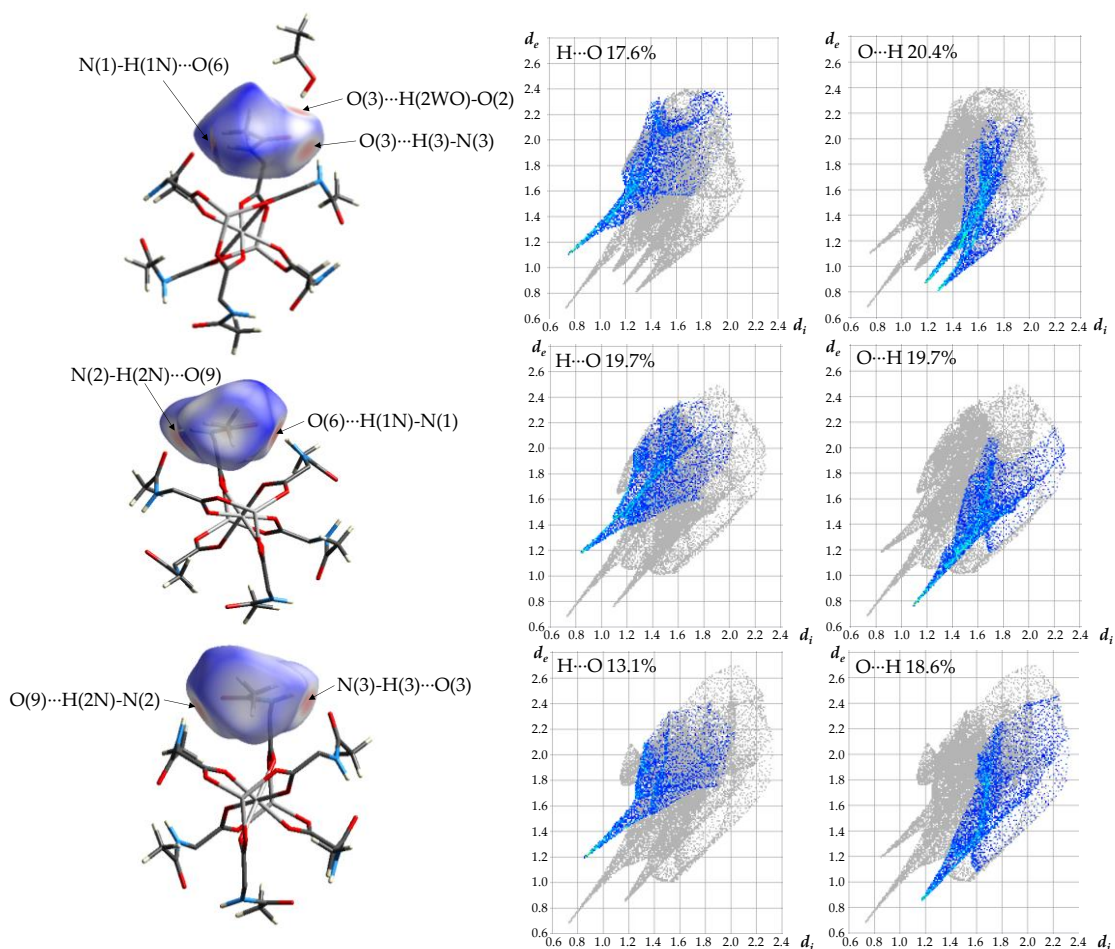

Figure S6. Hirshfeld surfaces with their respective 2D fingerprint plots highlighting the H...O and O...H contacts of the different acetamide moieties of **1C**.

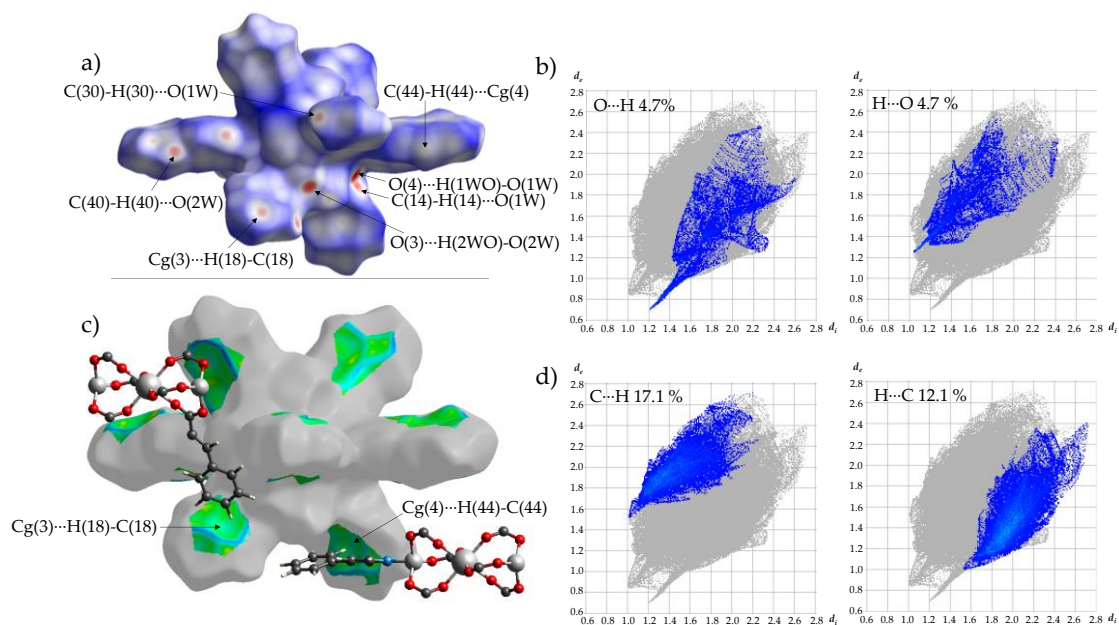

Figure S7. (a) Hirshfeld Surface  $d_{\text{norm}}$  representation of **1C**. (b) 2D fingerprint plot of **1C** highlighting the  $\text{O}\cdots\text{H}/\text{H}\cdots\text{O}$  contacts. (c) Curvedness representation of **1C**. (d) 2D fingerprint plot of **1C** highlighting the  $\text{C}\cdots\text{H}/\text{H}\cdots\text{C}$  contacts.

## CSD study of heterometallic [Zn<sub>2</sub>M] pinwheel SBUs (M = s-block metal)

Table S2. Overview of the main synthetic conditions utilized for the obtention of [Zn<sub>2</sub>M] pinwheel SBUs (M = s-block metal).

| CSD Refcodes | CCDC number | Metal sources/precursor                                                                                                         | Solvents                                                   | T (°C)        | Time         | Ref. |
|--------------|-------------|---------------------------------------------------------------------------------------------------------------------------------|------------------------------------------------------------|---------------|--------------|------|
| ALUQAC       | 2046852     | ZnCl <sub>2</sub> + BaCl <sub>2</sub>                                                                                           | DMF:EtOH:H <sub>2</sub> O:HNO <sub>3</sub><br>(30:30:15:1) | 130           | 72 h         | [3]  |
| AMIZIG       | 788694      | Zn(acac) <sub>2</sub> ·H <sub>2</sub> O + NaOH                                                                                  | H <sub>2</sub> O                                           | 180           | 72 h         | [4]  |
| ANEKUC       | 2023130     | Zn(NO <sub>3</sub> ) <sub>2</sub> ·6H <sub>2</sub> O + Ca(NO <sub>3</sub> ) <sub>2</sub> ·4H <sub>2</sub> O                     | DMF:H <sub>2</sub> O<br>(2:1)                              | 110           | 72 h         | [5]  |
| AYUKIQ       | 1497037     | Zn(OAc) <sub>2</sub> ·2H <sub>2</sub> O + H <sub>2</sub> sipNa                                                                  | DMF                                                        | 130           | 72 h         | [6]  |
| AXABUZ       | 2019199     | Zn(NO <sub>3</sub> ) <sub>2</sub> ·6H <sub>2</sub> O + Sr(NO <sub>3</sub> ) <sub>2</sub>                                        | DMF:H <sub>2</sub> O<br>(2:1)                              | 110           | 72 h         | [7]  |
| BUVFAC       | 1991083     | Zn(OAc) <sub>2</sub> ·2H <sub>2</sub> O + CaCl <sub>2</sub>                                                                     | DMF:EtOH:H <sub>2</sub> O<br>(4:1:1)                       | 110           | 144 h        | [8]  |
| DIRFIV       | 969906      | Only crystal structure reported                                                                                                 |                                                            |               |              | [9]  |
| FACQUW       | 182589      | Obtained as a minor product from the preparation of a homonuclear Zn(II) dimer                                                  |                                                            |               |              | [10] |
| FUFFIV       | 152594      | Zn(NO <sub>3</sub> ) <sub>2</sub> ·6H <sub>2</sub> O + Ca(NO <sub>3</sub> ) <sub>2</sub> ·4H <sub>2</sub> O                     | EtOH                                                       | 78            | 10 h         | [11] |
| GAWMIA       | 1164440     | Zn(crot) <sub>2</sub> + Mg(crot) <sub>2</sub>                                                                                   | EtOH                                                       | 78            | 10 min       | [12] |
| GAWMUM       | 116442      | Zn(crot) <sub>2</sub> + Sr(crot) <sub>2</sub>                                                                                   | EtOH                                                       | 78            | 10 min       |      |
| GAWMOG       | 1164441     | Zn(crot) <sub>2</sub> + Ca(crot) <sub>2</sub>                                                                                   | EtOH                                                       | 78            | 10 min       |      |
| GAXVOS       | 873031      | Zn(NO <sub>3</sub> ) <sub>2</sub> ·6H <sub>2</sub> O + Mg(NO <sub>3</sub> ) <sub>2</sub> ·6H <sub>2</sub> O                     | DMA:H <sub>2</sub> O                                       | 110           | 96 h         | [13] |
| GAXWEJ       | 873034      | Zn(NO <sub>3</sub> ) <sub>2</sub> ·6H <sub>2</sub> O + Mg(NO <sub>3</sub> ) <sub>2</sub>                                        | DMF:H <sub>2</sub> O                                       | 110           | 96 h         |      |
| KIKRIF       | 1196858     | Zn(crot) <sub>2</sub> + Mg(crot) <sub>2</sub>                                                                                   | EtOH                                                       | 78            | 10 min       | [14] |
| QEXCEE       | 1583903     | Zn(OAc) <sub>2</sub> ·2H <sub>2</sub> O + NaOH                                                                                  | CH <sub>3</sub> CN                                         | 170           | 72 h         | [15] |
| NAXVEP       | 841910      | Zn(OAc) <sub>2</sub> ·2H <sub>2</sub> O + CaCl <sub>2</sub>                                                                     | EtOH                                                       | 78            | 2 h          | [16] |
| NAXVOZ       | 841912      | Zn(OAc) <sub>2</sub> ·2H <sub>2</sub> O + Mg(OAc) <sub>2</sub> ·4H <sub>2</sub> O                                               | EtOH                                                       | 78            | 2 h          |      |
| NOHSOU       | 986349      | Zn(NO <sub>3</sub> ) <sub>2</sub> ·6H <sub>2</sub> O + Ca(OH) <sub>2</sub>                                                      | THF                                                        | 75            | 96 h         | [17] |
| OSOYUR       | 833777      | Zn(NO <sub>3</sub> ) <sub>2</sub> ·6H <sub>2</sub> O + Ca(OH) <sub>2</sub>                                                      | DMF:H <sub>2</sub> O (9:1)                                 | 95            | 48 h         | [18] |
| PADCII       | 716615      | Zn(OAc) <sub>2</sub> ·4H <sub>2</sub> O + Ca(OH) <sub>2</sub>                                                                   | H <sub>2</sub> O                                           | 160           | 72 h         | [19] |
| REFTUT       | 865281      | Zn(acac) <sub>2</sub> ·H <sub>2</sub> O + Ca(OAc) <sub>2</sub>                                                                  | H <sub>2</sub> O                                           | 200           | 120 h        | [20] |
| REFVAB       | 884315      | Zn(acac) <sub>2</sub> ·H <sub>2</sub> O + Ca(NO <sub>3</sub> ) <sub>2</sub> ·4H <sub>2</sub> O                                  | H <sub>2</sub> O                                           | 210           | 120 h        |      |
| SATYIV       | 1255426     | Zn(piv) <sub>2</sub> + Ba(piv) <sub>2</sub>                                                                                     | EtOH                                                       | 78            | 6 h          | [21] |
| SIGKUR       | 1565025     | Zn(NO <sub>3</sub> ) <sub>2</sub> ·6H <sub>2</sub> O + KOH                                                                      | DMF:MeOH (1:1)                                             | 120           | 72 h         | [22] |
| SIWJIU       | 1852418     | Zn(NO <sub>3</sub> ) <sub>2</sub> ·6H <sub>2</sub> O + Na <sub>3</sub> BTC                                                      | MeOH:H <sub>2</sub> O (1:1)                                | RT (Layering) | 240 h        | [23] |
| ULAYAK       | 2010503     | [Zn <sub>2</sub> Ca(piv) <sub>4</sub> (py) <sub>2</sub> ]                                                                       | DMF                                                        | 95            | 120 h        | [24] |
| ULAYEO       | 2010504     | Zn(piv) <sub>2</sub> + Ca(NO <sub>3</sub> ) <sub>2</sub> ·4H <sub>2</sub> O                                                     | CH <sub>3</sub> CN                                         | 75            | 1.5 h        |      |
| XIQFUA       | 888602      | Zn(NO <sub>3</sub> ) <sub>2</sub> ·6H <sub>2</sub> O + Sr(NO <sub>3</sub> ) <sub>2</sub>                                        | DMF:H <sub>2</sub> O (1:1)                                 | 110           | 96 h         | [25] |
| XOXJEA       | 729288      | Zn(NO <sub>3</sub> ) <sub>2</sub> ·6H <sub>2</sub> O + Ca(NO <sub>3</sub> ) <sub>2</sub> ·4H <sub>2</sub> O                     | MeOH                                                       | RT            | Several days | [26] |
| XOXJIE       | 729289      | Zn(NO <sub>3</sub> ) <sub>2</sub> ·6H <sub>2</sub> O + Ca(NO <sub>3</sub> ) <sub>2</sub> ·4H <sub>2</sub> O                     | MeOH                                                       | RT            | Several days |      |
| YECJEY       | 1565081     | Zn(NO <sub>3</sub> ) <sub>2</sub> ·6H <sub>2</sub> O + Mg(NO <sub>3</sub> ) <sub>2</sub> ·6H <sub>2</sub> O                     | Pyridine                                                   | 160           | 144 h        | [27] |
| -            | 952631      | Zn(NO <sub>3</sub> ) <sub>2</sub> ·6H <sub>2</sub> O + Ca(NO <sub>3</sub> ) <sub>2</sub> ·4H <sub>2</sub> O                     | DMF:MeOH (1:1)                                             | 80            | 96 h         | [28] |
| -            | -           | [Zn(CO <sub>3</sub> ) <sub>2</sub> ] <sub>2</sub> [Zn(OH) <sub>2</sub> ] <sub>3</sub> +<br>CaCl <sub>2</sub> ·2H <sub>2</sub> O | H <sub>2</sub> O                                           | RT            | -            | [29] |
| -            | -           | [Zn(CO <sub>3</sub> ) <sub>2</sub> ] <sub>2</sub> [Zn(OH) <sub>2</sub> ] <sub>3</sub> +<br>CaCl <sub>2</sub> ·2H <sub>2</sub> O | H <sub>2</sub> O                                           | RT            | -            |      |

Zn(acac)<sub>2</sub>·H<sub>2</sub>O = Zinc acetylacetonate hydrate; H<sub>2</sub>sip = 5-sulfoisophthalic acid; crot = crotonate; piv = pivalate; BTC = 1,3,5-benzenetricarboxylate; py = pyridine



Table S3. Overview of the main SBU features of the crystal structures with  $[\text{Zn}_2\text{M}]$  pinwheel SBUs (M = s-block metal) found on the literature.

| CSD Refcodes | CCDC number | Dimensionality | Central Core     | Lateral Core               | Apical positions | Reference |
|--------------|-------------|----------------|------------------|----------------------------|------------------|-----------|
| ALUQAC       | 2046852     | 2D             | $[\text{BaO}_6]$ | $[\text{ZnO}_4]$           | Carboxylate      | [3]       |
| AMIZIG       | 788694      | 3D             | $[\text{NaO}_6]$ | $[\text{ZnO}_4]$           | Water            | [4]       |
| ANEKUC       | 2023130     | 3D             | $[\text{CaO}_6]$ | $[\text{ZnO}_4]$           | Water            | [5]       |
| AYUKIQ       | 1497037     | 1D             | $[\text{NaO}_6]$ | $[\text{ZnO}_3\text{N}_2]$ | Pyridines        | [6]       |
| AXABUZ       | 2019199     | 3D             | $[\text{SrO}_8]$ | $[\text{ZnO}_4]$           | Water            | [7]       |
| BUVFAC       | 1991083     | 3D             | $[\text{CaO}_6]$ | $[\text{ZnO}_5]$           | Carboxylate      | [8]       |
| DIRFIV       | 969906      | 0D             | $[\text{CaO}_6]$ | $[\text{ZnO}_3\text{N}_2]$ | Pyridines        | [9]       |
| FACQUW       | 182589      | 0D             | $[\text{CaO}_6]$ | $[\text{ZnO}_3\text{N}]$   | Pyridines        | [10]      |
| FUFFIV       | 152594      | 0D             | $[\text{CaO}_6]$ | $[\text{ZnO}_3\text{N}]$   | Pyridines        | [11]      |
| GAWMIA       | 1164440     | 0D             | $[\text{MgO}_6]$ | $[\text{ZnO}_4\text{N}]$   | Pyridines        | [12]      |
| GAWMUM       | 116442      | 0D             | $[\text{SrO}_6]$ | $[\text{ZnO}_3\text{N}]$   | Pyridines        |           |
| GAWMOG       | 1164441     | 0D             | $[\text{CaO}_6]$ | $[\text{ZnO}_3\text{N}]$   | Pyridines        |           |
| GAXVOS       | 873031      | 2D             | $[\text{MgO}_6]$ | $[\text{ZnO}_4]$           | DMA              | [13]      |
| GAXWEJ       | 873034      | 3D             | $[\text{BaO}_8]$ | $[\text{ZnO}_4]$           | Carboxylate      |           |
| KIKRIF       | 1196858     | 0D             | $[\text{MgO}_6]$ | $[\text{ZnO}_4\text{N}]$   | Pyridines        | [14]      |
| QEXCEE       | 1583903     | 3D             | $[\text{NaO}_6]$ | $[\text{ZnO}_4]$           | Water            | [15]      |
| NAXVEP       | 841910      | 0D             | $[\text{CaO}_6]$ | $[\text{ZnO}_3\text{N}]$   | Pyridines        | [16]      |
| NAXVOZ       | 841912      | 0D             | $[\text{MgO}_6]$ | $[\text{ZnO}_3\text{N}]$   | Pyridines        |           |
| NOHSOU       | 986349      | 3D             | $[\text{CaO}_6]$ | $[\text{ZnO}_4]$           | Water            | [17]      |
| OSOYUR       | 833777      | 3D             | $[\text{CaO}_6]$ | $[\text{ZnO}_4]$           | Water            | [18]      |
| PADCII       | 716615      | 3D             | $[\text{CaO}_6]$ | $[\text{ZnO}_4\text{N}]$   | Pyridines        | [19]      |
| REFTUT       | 865281      | 3D             | $[\text{CaO}_6]$ | $[\text{ZnO}_4]$           | Water            | [20]      |
| REFVAB       | 884315      | 3D             | $[\text{CaO}_6]$ | $[\text{ZnO}_4]$           | Water            |           |
| SATYIV       | 1255426     | 0D             | $[\text{BaO}_6]$ | $[\text{ZnO}_3\text{N}]$   | Pyridines        | [21]      |
| SIGKUR       | 1565025     | 3D             | $[\text{KO}_6]$  | $[\text{ZnO}_4]$           | MeOH             | [22]      |
| SIWJIU       | 1852418     | 2D             | $[\text{NaO}_6]$ | $[\text{ZnO}_4\text{N}]$   | Pyridines        | [23]      |
| ULAYAK       | 2010503     | 3D             | $[\text{CaO}_6]$ | $[\text{ZnO}_4]$           | Carboxylate      | [24]      |
| ULAYEO       | 2010504     | 0D             | $[\text{CaO}_6]$ | $[\text{ZnO}_3\text{N}]$   | Pyridines        |           |
| XIQFUA       | 888602      | 3D             | $[\text{SrO}_8]$ | $[\text{ZnO}_4]$           | Carboxylate      | [25]      |
| XOXJEA       | 729288      | 1D             | $[\text{CaO}_6]$ | $[\text{ZnO}_3\text{N}]$   | Pyridines        | [26]      |
| XOXJIE       | 729289      | 1D             | $[\text{CaO}_6]$ | $[\text{ZnO}_3\text{N}]$   | Pyridines        |           |
| YECJEY       | 1565081     | 2D             | $[\text{MgO}_6]$ | $[\text{ZnO}_3\text{N}]$   | Pyridines        | [27]      |
| -            | 952631      | 2D             | $[\text{CaO}_6]$ | $[\text{ZnO}_4]$           | DMF              | [28]      |
| -            | -           | 1D             | $[\text{CaO}_6]$ | $[\text{ZnO}_3\text{N}]$   | Pyridines        | [29]      |
| -            | -           | 1D             | $[\text{CaO}_6]$ | $[\text{ZnO}_3\text{N}]$   | Pyridines        |           |

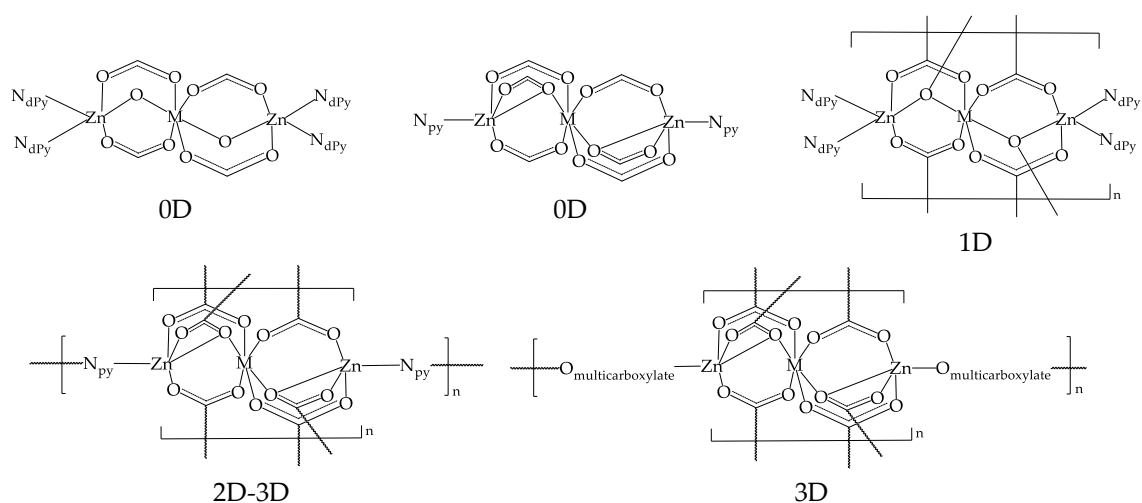

Figure S8. Outline of the five-coordinated Zn(II) *cores* found on the CSD search of [Zn<sub>2</sub>M] pinwheel SBUs (M = s-block metals).

### Photophysical properties

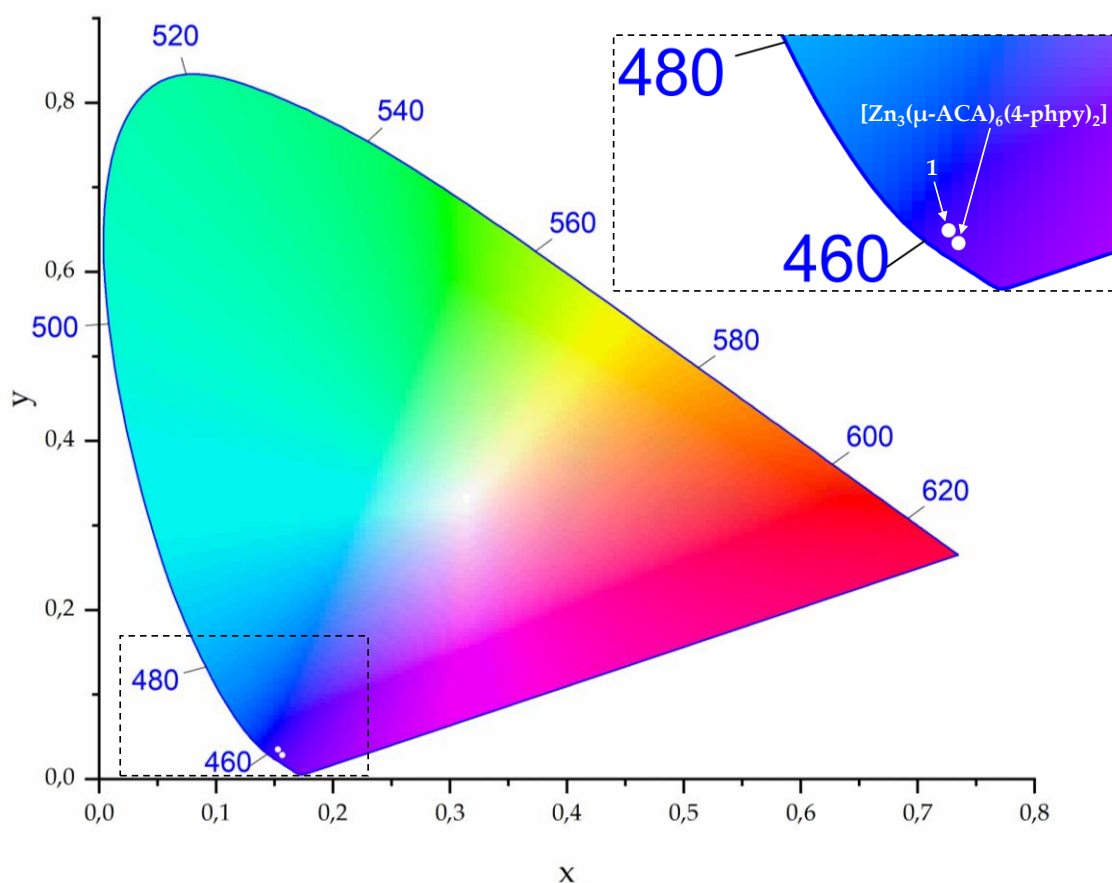

Figure S9. CIE 1931 chromaticity diagram for **1** and  $[Zn_3(\mu-ACA)_6(4-phpy)_2]$ .

## References

1. Llunell, M.; Casanova, D.; Cirera, J.; Alemany, P.; Alvarez, S. *SHAPE. Program for the Stereochemical Analysis of Molecular Fragments by Means of Continuous Shape Measures and Associated Tools*. Universitat de Barcelona, Barcelona, **2013**.
2. Pinsky, M.; Avnir, D. Continuous Symmetry Measures. 5. The Classical Polyhedra. *Inorg. Chem.* **1998**, *37*, 5575–5582, doi:10.1021/ic9804925.
3. Chen, H.; Fan, L.; Hu, T.; Zhang, X. 6s-3d {Ba<sub>3</sub>Zn<sub>4</sub>}–Organic Framework as an Effective Heterogeneous Catalyst for Chemical Fixation of CO<sub>2</sub> and Knoevenagel Condensation Reaction. *Inorg. Chem.* **2021**, *60*, 3384–3392, doi:10.1021/acs.inorgchem.0c03736.
4. Bo, Q.-B.; Zhang, Z.-W.; Miao, J.-L.; Wang, D.-Q.; Sun, G.-X. Novel metal–organic frameworks (MOFs) based on heterometallic nodes and 5-methylisophthalate linkers. *CrystEngComm* **2011**, *13*, 1765, doi:10.1039/c0ce00811g.
5. Song, Y.; Wang, B.; Liu, Y.; Guo, L.-J.; Cao, J.-J.; Li, W.-H.; Liu, T.; Qiao, S.; Guo, L.-D. Heterometallic trinuclear cluster-based microporous metal-organic framework with high adsorption selectivity of CO<sub>2</sub> over N<sub>2</sub>. *Inorg. Chem. Commun.* **2020**, *121*, 108202, doi:10.1016/j.inoche.2020.108202.
6. Zhou, Y.-H.; Zhou, X.-W.; Zhou, S.-R.; Tian, Y.-P.; Wu, J.-Y. A series of coordination polymers constructed from R-isophthalic acid (R=–SO<sub>3</sub>H, –NO<sub>2</sub>, and –OH) and N-donor ligands: Syntheses, structures and fluorescence properties. *J. Solid State Chem.* **2017**, *245*, 190–199, doi:10.1016/j.jssc.2016.10.023.
7. Guo, L.; Liu, Y.; Guo, L.; Cao, J.; Li, W.; Liu, T.; Qiao, S.; Wang, B. A new porous heterometallic metal-organic framework for gas adsorption and luminescence sensing. *Zeitschrift für Anorg. und Allg. Chemie* **2021**, *647*, 1077–1082, doi:10.1002/zaac.202000367.
8. Ji, W.-J.; Liu, G.-F.; Wang, B.-Q.; Lu, W.-B.; Zhai, Q.-G. Design of a heterometallic Zn/Ca-MOF decorated with alkoxy groups on the pore surface exhibiting high fluorescence sensing performance for Fe<sup>3+</sup> and Cr<sub>2</sub>O<sub>7</sub><sup>2-</sup>. *CrystEngComm* **2020**, *22*, 4710–4715, doi:10.1039/D0CE00457J.
9. Pramanik, A.; Fronczek, F.R.; Venkatraman, R.; Hossain, M.A. Hexa-μ-acetato-1:2κ<sup>4</sup>O,O';1:2κ<sup>2</sup>O:O';2:3κ<sup>4</sup>O,O';2:3κ<sup>2</sup>O:O-bis(4,4'-dimethyl-2,2'-bipyridine)-1κ<sup>2</sup>N,N';3κ<sup>2</sup>N,N'-2-calcium-1,3-dizinc. *Acta Cryst.* **2013**, *E69*, m643–m644, doi:10.1107/S1600536813030122.
10. Necefoglu, H.; Clegg, W.; Scott, A.J. A linear trinuclear CaZn<sub>2</sub> complex with bridging benzoate ligands. *Acta Cryst. Sect. E* **2002**, *58*, m123–m124, doi:10.1107/S160053680200209X.
11. Cui, Y.; Zhang, X.; Zheng, F.; Ren, J.; Chen, G.; Qian, Y.; Huang, J. Two mixed-metal carboxylate–base adducts. *Acta Cryst.* **2000**, *C56*, 1198–1200, doi:10.1107/S0108270100009999.
12. Clegg, W.; Little, I.R.; Straughan, B.P. Zinc Carboxylate Complexes: Structural Characterization of the Mixed-Metal Linear Trinuclear Complexes MZn<sub>2</sub>(crot)<sub>6</sub>(base)<sub>2</sub> (M = Mn, Co, Ni, Zn, Cd, Mg, Ca, Sr; crot = Crotonate(1-); Base = Quinoline, 6-Methylqui. *Inorg. Chem.* **1988**, *27*, 1916–1923.
13. Zhang, X.; Huang, Y.-Y.; Cheng, J.-K.; Yao, Y.-G.; Zhang, J.; Wang, F. Alkaline earth metal ion doped Zn(II)-terephthalates. *CrystEngComm* **2012**, *14*, 4843, doi:10.1039/c2ce25440a.

14. Clegg, W.; Harbron, D.R.; Straughan, B.P. Structures of the mixed-metal carboxylate base adducts  $[\text{MgZn}_2(\text{crotonate})_6(4\text{-vinylpyridine})_2]$  and  $[\text{MgCo}_2(\text{crotonate})_6(4\text{-vinylpyridine})_4]$ . *Acta Cryst.* **1991**, *C47*, 267–270, doi:10.1107/S0108270190008204.
15. Liu, L.-L.; Yu, Y.-Z.; Zhao, X.-J.; Wang, Y.-R.; Cheng, F.-Y.; Zhang, M.-K.; Shu, J.-J.; Liu, L. A robust Zn(II)/Na(II)-MOF decorated with  $[(\text{OAc})_2(\text{H}_2\text{O})_2]_{n^{2n-}}$  anions for the luminescence sensing of copper ions based on the inner filter effect. *Dalton Trans.* **2018**, *47*, 7787–7794, doi:10.1039/C8DT00908B.
16. Escobedo-Martínez, C.; Lozada, M.C.; Gnecco, D.; Enriquez, R.G.; Soriano-García, M.; Reynolds, W.F. Acetate Bridged Trinuclear Zn, Ca and Mg Metal Complexes with 2- and 4-Substituted Pyridines. *J. Chem. Crystallogr.* **2012**, *42*, 794–802, doi:10.1007/s10870-012-0316-7.
17. Noh, K.; Ko, N.; Park, H.J.; Park, S.; Kim, J. Two porous metal–organic frameworks containing zinc–calcium clusters and calcium cluster chains. *CrystEngComm* **2014**, *16*, 8664–8668, doi:10.1039/C4CE01237B.
18. Zou, R.; Zhong, R.; Han, S.; Xu, H.; Burrell, A.K.; Henson, N.; Cape, J.L.; Hickmott, D.D.; Timofeeva, T. V.; Larson, T.E.; et al. A Porous Metal–Organic Replica of  $\alpha\text{-PbO}_2$  for Capture of Nerve Agent Surrogate. *J. Am. Chem. Soc.* **2010**, *132*, 17996–17999, doi:10.1021/ja101440z.
19. Ma, L.-F.; Li, B.; Sun, X.-Y.; Wang, L.-Y.; Fan, Y.-T. Hydrothermal Syntheses and Characterizations of Three  $\text{Zn}^{\text{II}}$  Coordination Polymers Tuned by pH Value and Base. *Zeitschrift für Anorg. und Allg. Chemie* **2010**, *636*, 1606–1611, doi:10.1002/zaac.200900516.
20. Bo, Q.-B.; Wang, H.-Y.; Miao, J.-L.; Wang, D.-Q. Fluorescent Zn-based hetero-MOFs design via single metal site substitution. *RSC Adv.* **2012**, *2*, 11650, doi:10.1039/c2ra21863a.
21. Clegg, W.; Hunt, P.A.; Straughan, B.P.; Mendiola, M.A. Preparation and Characterisation of Linear Mixed-metal Trinuclear Carboxylate Complexes of General Formula  $[\text{M}, \text{M}'(\text{O}_2\text{CR})_6(\text{C}_9\text{H}_7\text{N})_n]$ ; Crystal Structure of  $[\text{Zn}_2\text{Ba}(\text{O}_2\text{CCMe}_3)_6]$ . *J. Chem. Soc. Dalton Trans.* **1989**, 1127–1131.
22. Zhao, Y.-N.; Zhang, S.-R.; Wang, W.; Xu, Y.-H.; Che, G.-B. A 3D metal–organic framework with dual-aerial-octahedral trinucleate building units: synthesis, structure and fluorescence sensing properties. *New J. Chem.* **2018**, *42*, 14648–14654, doi:10.1039/C8NJ02078G.
23. Rajak, R.; Saraf, M.; Mobin, S.M. Robust heterostructures of a bimetallic sodium–zinc metal–organic framework and reduced graphene oxide for high-performance supercapacitors. *J. Mater. Chem. A* **2019**, *7*, 1725–1736, doi:10.1039/C8TA09528K.
24. Rubtsova, I.K.; Melnikov, S.N.; Shmelev, M.A.; Nikolaevskii, S.A.; Yakushev, I.A.; Voronina, J.K.; Barabanova, E.D.; Kiskin, M.A.; Sidorov, A.A.; Eremenko, I.L. Facile synthesis and structure elucidation of metal–organic frameworks with  $\{\text{ZnCa}\}$  and  $\{\text{Zn}_2\text{Ca}\}$  metal cores. *Mendeleev Commun.* **2020**, *30*, 722–724, doi:10.1016/j.mencom.2020.11.011.
25. Kang, X.-P.; Zhu, L.-H.; Hu, Y.-S.; An, Z. Organically templated (3,8)-connected microporous heterometallic Zn(II)–Sr(II) coordination polymer. *Inorg. Chem. Commun.* **2013**, *29*, 11–13, doi:10.1016/j.inoche.2012.11.030.
26. Zhang, E.; Hou, H.; Meng, X.; Liu, Y.; Liu, Y.; Fan, Y. Ferrocenyl Functional Coordination Polymers Based on Mono-, Bi-, and Heterotrinuclear Organometallic Building Blocks: Syntheses, Structures, and Properties. *Cryst. Growth Des.* **2009**, *9*, 903–913,

doi:10.1021/cg800661g.

27. Wu, Z.-F.; Huang, X.-Y. A series of Mg–Zn heterometallic coordination polymers: synthesis, characterization, and fluorescence sensing for Fe<sup>3+</sup>, CS<sub>2</sub>, and nitroaromatic compounds. *Dalton Trans.* **2017**, 46, 12597–12604, doi:10.1039/C7DT02800H.
28. Gao, H.; Lou, X.; Li, Q.-T.; Du, W.-J.; Xu, C. Three new coordination polymers based on tripodal flexible ligand: Synthesis, structures and luminescent properties. *Inorg. Chim. Acta* **2014**, 412, 46–51, doi:10.1016/j.ica.2013.12.016.
29. Hazra, S.; Das, L.K.; Bhattacharya, R.; Drew, M.G.B.; Ghosh, A. Variations of structures on changing the ratios of metal ions in rare Ca(II)–Zn(II) hetero-metallic self-assembled coordination polymers of hexamethylenetetramine and benzoate. *J. Indian Chem. Soc.* **2021**, 98, 100097, doi:10.1016/j.jics.2021.100097.
