# Supplementary material
Source: MDPI journal article supplement (https://www.mdpi.com/2304-6740/10/8/118)
Supplement: s1 [file s1]

Archive with 2 entries (2 files):
- c20yb71_0m_aa_ca.pdf
- Supporting Information.pdf
